# Supplementary material for: The CFTR Amplifier Nesolicaftor Rescues TGF-β1 Inhibition of Modulator-Corrected F508del CFTR Function
Source: MDPI journal article supplement (doi:10.3390/ijms231810956), 2022-09-19
Supplement: s1 [file s1]

## Supplementary Materials

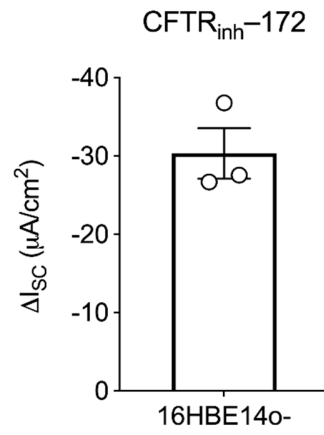

**Supplementary Figure S1.** CFTR-dependent short-circuit currents ( $I_{sc}$ ) measured in Ussing chambers from confluent monolayers of the wild-type 16HBE14o- cell line.

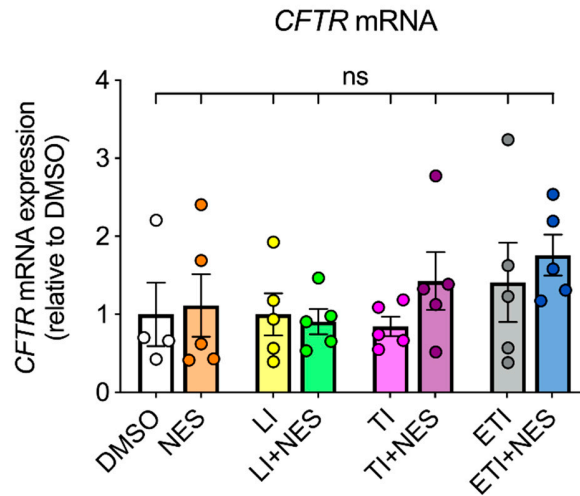

**Supplementary Figure S2.** Effects of nesolicaftor (NES) on *CFTR* mRNA expression levels in modulator-corrected F508del-*CFTR* 16HBEge cells *in vitro*. Confluent monolayers of F508del-*CFTR* 16HBEge cells were treated with DMSO, NES (10  $\mu$ M), lumacaftor (5  $\mu$ M)/ivacaftor (1  $\mu$ M) (LI), LI + NES, tezacaftor (5  $\mu$ M)/ivacaftor (1  $\mu$ M) (TI), TI + NES, elexacaftor (1  $\mu$ M)/tezacaftor (5  $\mu$ M)/ivacaftor (1  $\mu$ M) (ETI), or ETI + NES both apically and basolaterally for 24 h. Nesolicaftor does not significantly change expression levels of *CFTR* mRNA under any treatment condition. *Statistics:* Kruskal-Wallis test after assessing normality with Shapiro-Wilk. ns = not significant.

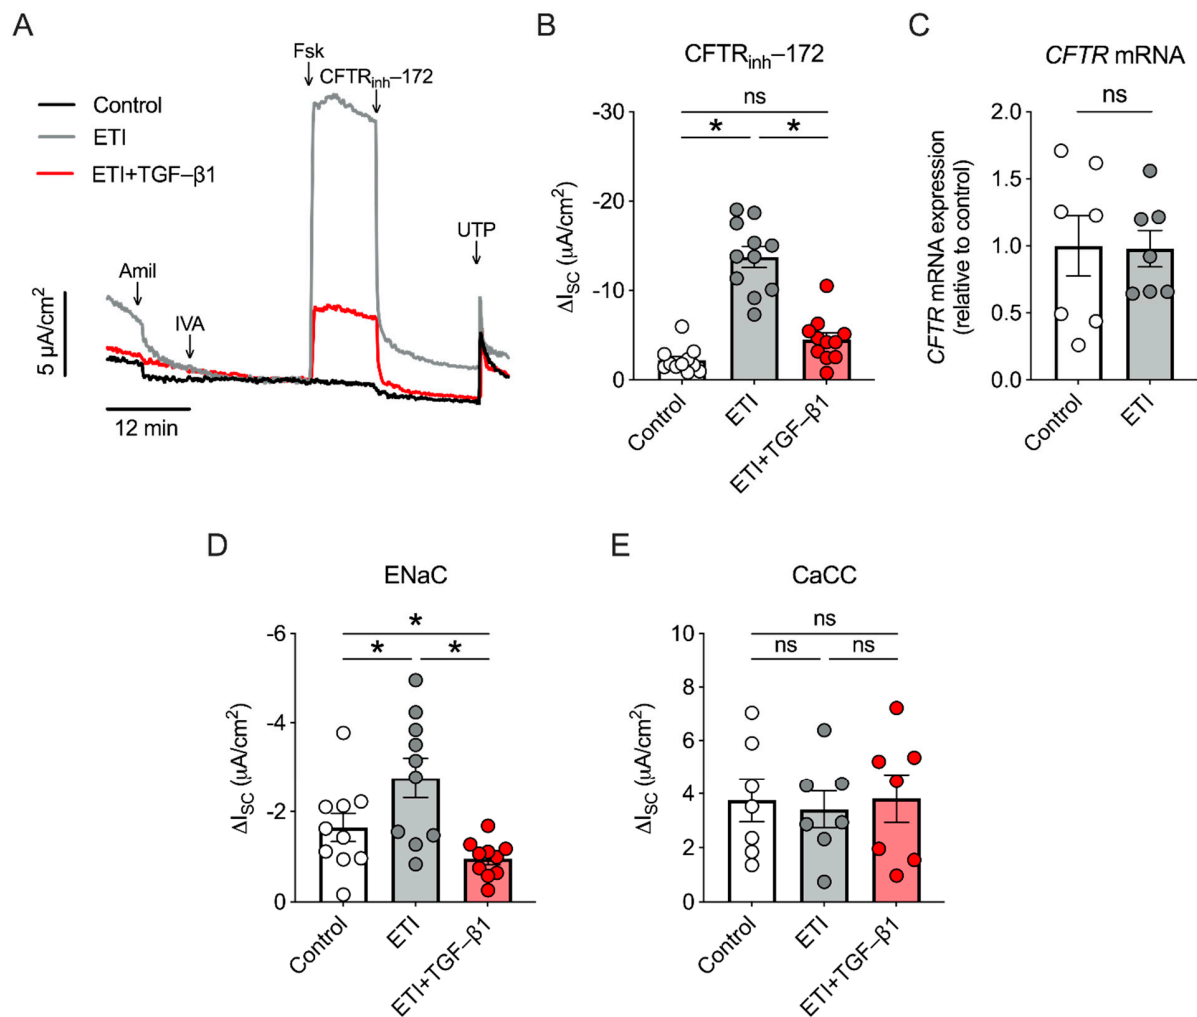

**Supplementary Figure S3.** Effects of ETI and TGF-β1 on ion channel function in primary CFBE cells *in vitro*. **(A)** Fully differentiated ALI cultures of primary human CFBE cells homozygous for F508del were treated with DMSO (control), ellexacaftor (1  $\mu\text{M}$ )/tezacaftor (5  $\mu\text{M}$ )/ivacaftor (1  $\mu\text{M}$ ) (ETI), or ETI + TGF-β1 (5 ng/mL) for 24 h and CFTR-dependent  $I_{sc}$  was measured in Ussing chambers. **(B)** ETI causes a significant increase in F508del-CFTR function after 24 h, an effect inhibited by TGF-β1.  $n = 12$ , 5 CF lungs. **(C)** ETI does not change expression levels of CFTR mRNA after 24 h.  $n = 7$ , 4 CF lungs. **(D)** ETI causes a significant increase in ENaC conductance after 24 h. TGF-β1 causes a significant decrease in ENaC function.  $n = 10$ , 5 CF lungs. **(E)** ETI and TGF-β1 do not change CaCC activity after 24 h.  $n = 7$ , 5 CF lungs. *Statistics:* \*  $p < 0.05$ , Friedman test (A), Student's t-test (B), or one-way ANOVA followed by Holm-Sidak (D,E) after assessing normality with Shapiro-Wilk. ns = not significant.

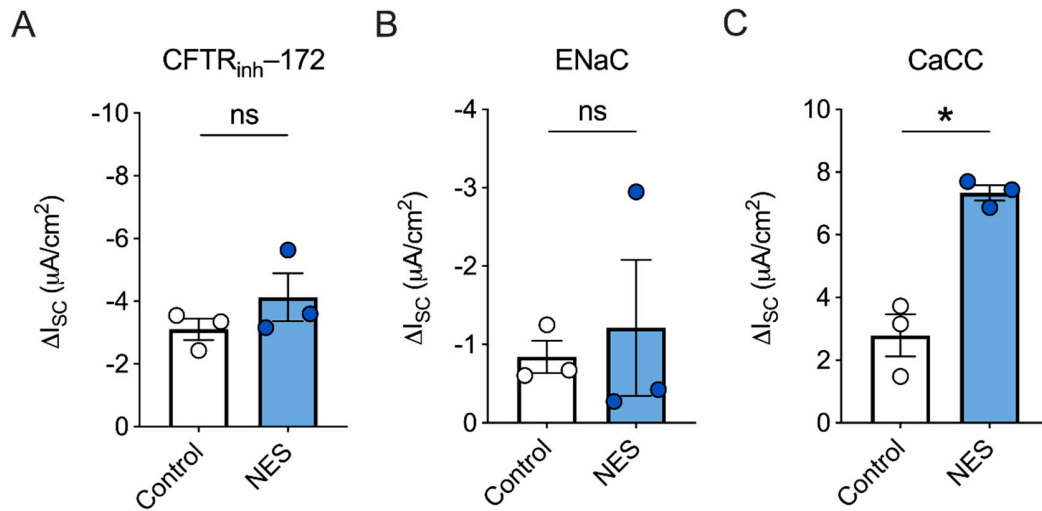

**Supplementary Figure S4.** Effects of nesolikaftor (NES) on ion channel function in primary CFBE cells *in vitro*. (A) Fully differentiated ALI cultures of primary human CFBE cells homozygous for F508del were treated with DMSO (control) or NES (10  $\mu M$ ) for 24 h. (A,B) Nesolikaftor did not cause a significant increase in CFTR (A) or ENaC (B) conductance after 24 h.  $n = 3$  CF lungs. (C) Nesolikaftor significantly increases CaCC activity in CFBE cells after 24 h.  $n = 3$  CF lungs. Statistics: \*  $p < 0.05$ , Student's t-test after assessing normality with Shapiro-Wilk. ns = not significant.

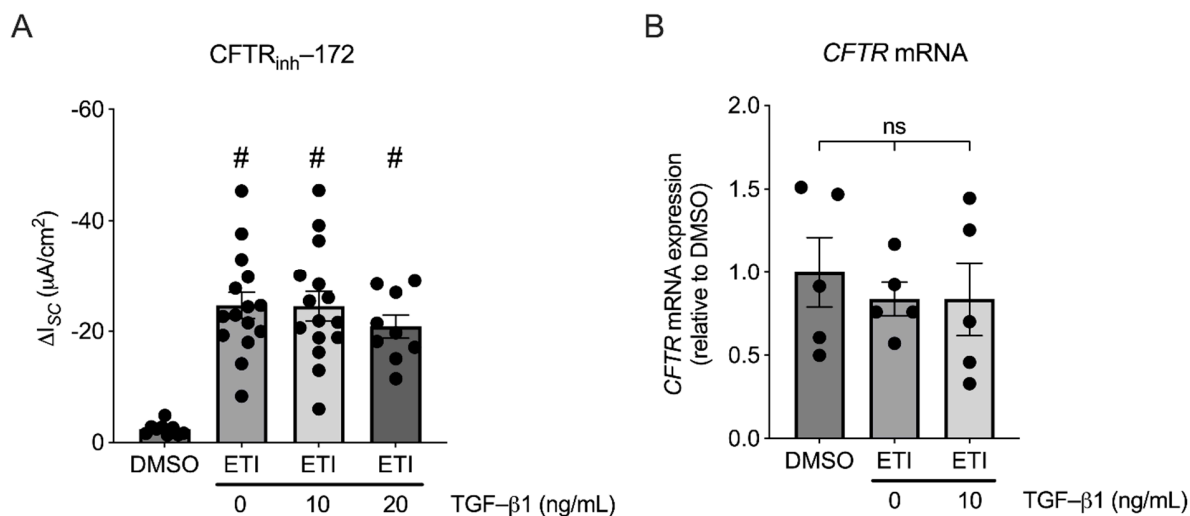

**Supplementary Figure S5.** Effects of TGF- $\beta$ 1 on ETI-corrected F508del-CFTR function and CFTR mRNA expression in F508del-CFTR 16HBEge cells *in vitro*. (**A,B**) Confluent monolayers of F508del-CFTR 16HBEge cells were treated with DMSO or elexacaftor (1  $\mu$ M)/tezacaftor (5  $\mu$ M)/ivacaftor (1  $\mu$ M) (ETI) with indicated concentrations of TGF- $\beta$ 1 both apically and basolaterally for 24 h. TGF- $\beta$ 1 does not significantly change CFTR conductance (**A**) or expression levels of CFTR mRNA (**B**). Statistics: #  $p < 0.05$  compared to DMSO control, one-way ANOVA followed by Holm-Sidak after assessing normality with Shapiro-Wilk. ns = not significant.

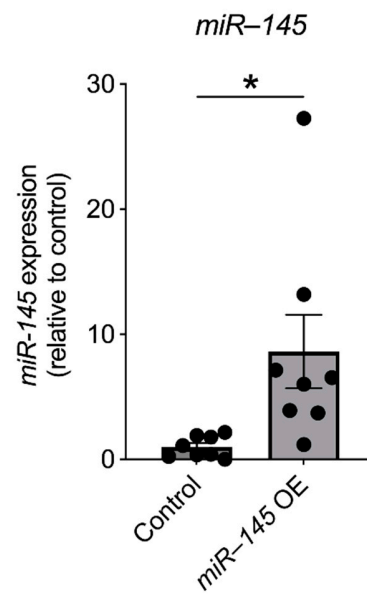

**Supplementary Figure S6.** Levels of *miR-145* expression in primary CFBE cells transduced with *miR-145* lentivirus compared to control. *Statistics:* \*  $p < 0.05$ , Mann-Whitney test after assessing normality with Shapiro-Wilk.
